# Supplementary material for: Edwardsiella ictaluri Almost Completely Occupies the Gut Microbiota of Fish Suffering from Enteric Septicemia of Catfish (Esc)
Source: MDPI journal article supplement (doi:10.3390/fishes8010030), 2023-01-03
Supplement: s1 [file s1]

# ***Edwardsiella ictaluri* Almost Completely Occupies the Gut Microbiota of Fish Suffering from Enteric Septicemia of Catfish (Esc)**

Jicheng Yang <sup>1,2</sup>, Yaoyao Lin <sup>2,3</sup>, Zhaohui Wei <sup>4</sup>, Zhenbing Wu <sup>2,5</sup>, Qianqian Zhang <sup>2,6</sup>, Jingwen Hao <sup>2,3</sup>, Shuyi Wang <sup>2,3</sup> and Aihua Li <sup>2,3,6,\*</sup>

<sup>1</sup> College of Fisheries and Life Science, Dalian Ocean University, Dalian 116023, China; yangjc@ihb.ac.cn (J.Y.)

<sup>2</sup> State Key Laboratory of Freshwater Ecology and Biotechnology, Institute of Hydrobiology, Chinese Academy of Sciences, Wuhan 430072, China; linyaoyao@ihb.ac.cn (Y.L.); zqq@ihb.ac.cn (Q.Z.); haojingwen@ihb.ac.cn (J.H.); wangsy@ihb.ac.cn (S.W.); wuzhenbing@ihb.ac.cn (Z.W.)

<sup>3</sup> University of Chinese Academy of Sciences, Beijing 100049, China

<sup>4</sup> Wuhan Institute of Fishery, Wuhan 430072, China; jb-158@163.com (Z.W.)

<sup>5</sup> School of Environmental Science and Engineering, Huazhong University of Science and Technology, Wuhan 430074, China

<sup>6</sup> National Aquatic Biological Resource Center, NABRC, Wuhan 430072, China

\* Correspondence: liaihua@ihb.ac.cn; Tel.: 86-27-68780053

**Table S1.** Number of sequences analyzed, observed diversity richness (OTUs), estimated OTU richness (Chao1), diversity index (Shannon and Simpson), and estimated sample coverage for 16S rRNA libraries of the different samples. H1~H3 stand for the intestinal samples of the healthy fish, and D1~D6 stand for the intestinal samples of the diseased fish, and W1, W2 for the water sample of Diseased and healthy ponds, respectively.

| Sample | OTU | Shannon | Simpson | Chao1 | Coverage (%) |
|--------|-----|---------|---------|-------|--------------|
| H1     | 215 | 2.15    | 0.24    | 223   | 99.96        |
| H2     | 276 | 1.09    | 0.69    | 293   | 99.90        |
| H3     | 171 | 1.37    | 0.51    | 196   | 99.88        |
| D1     | 46  | 0.03    | 0.99    | 58    | 99.94        |
| D2     | 65  | 0.09    | 0.98    | 88    | 99.92        |
| D3     | 53  | 0.17    | 0.95    | 65    | 99.94        |
| D4     | 43  | 0.04    | 0.99    | 84    | 99.91        |
| D5     | 41  | 0.03    | 0.99    | 52    | 99.94        |
| D6     | 49  | 0.04    | 0.99    | 72    | 99.93        |
| W1     | 477 | 4.16    | 0.03    | 550   | 99.69        |
| W2     | 466 | 4.22    | 0.03    | 529   | 99.75        |

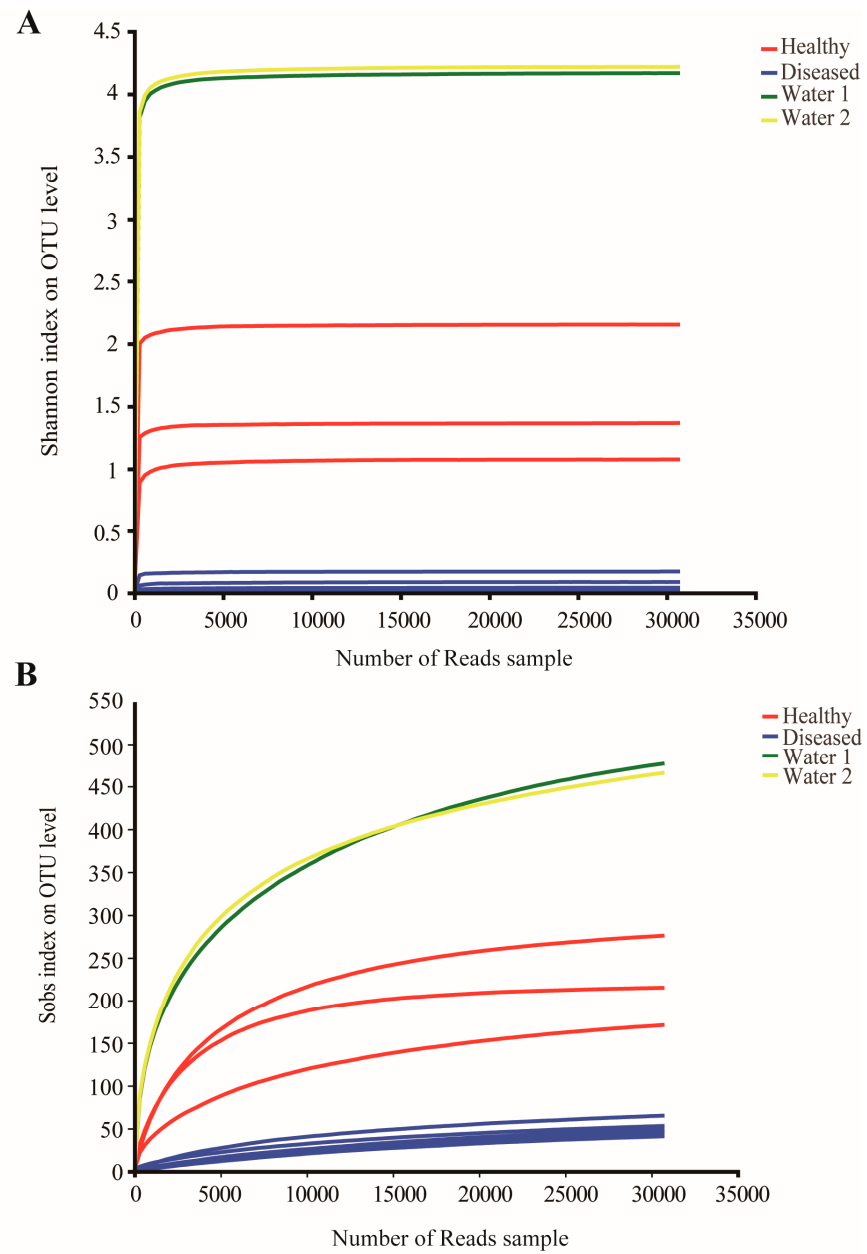

**Figure S1.** Rarefaction analyses of OTUs clustered at 97% sequence identity of all samples: **(A)** Shannon curves on OTU level of the intestinal and water sample; **(B)** Rarefaction curves on OTU level of the intestinal and water sample.

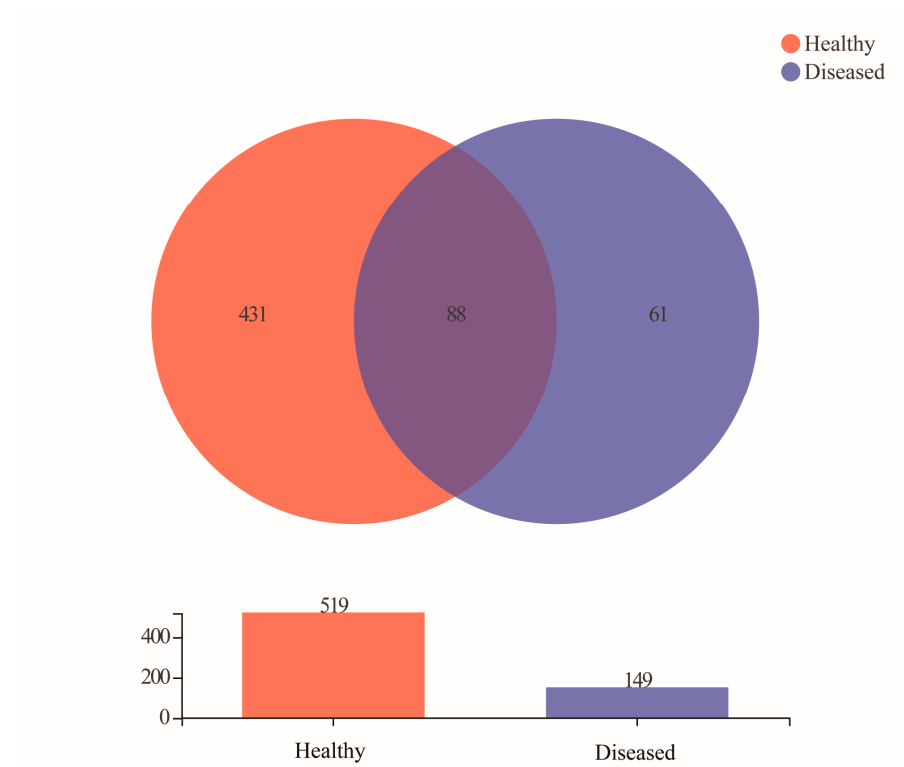

**Figure S2.** The Venn diagram showing the numbers of OTUs that were shared and unique in the gut communities (97% sequence identity); Healthy and Diseased represent the intestinal samples of healthy and diseased fish.
