# Supplementary material for: Edwardsiella ictaluri Almost Completely Occupies the Gut Microbiota of Fish Suffering from Enteric Septicemia of Catfish (Esc)
Source: MDPI journal article supplement (doi:10.3390/fishes8010030), 2023-01-03
Supplement: s1 [file s1]

Archive with 1 entries (1 files):
- fishes-1995184-supplementary.pdf
